# Supplementary material for: Highly efficient organic solar cells enabled by ultraviolet-ozone treated molybdenum oxide hole transport layers
Source: Royal Society of Chemistry journal article supplement (doi:10.1039/d4ta07795d), 2025-01-01
Supplement: d4ta07795d1.pdf [file d4ta07795d1.pdf]

## **Highly efficient organic solar cells enabled by ultraviolet-ozone treated molybdenum oxide hole transport layers.**

### **Affiliations**

**Apostolos Panagiotopoulos<sup>a</sup>, George Kakavelakis<sup>b</sup>, Kyriakos Almpandis<sup>a</sup>, Leslie Askew<sup>b</sup>, Dimitar Kutsarov<sup>a</sup>, S. Ravi P. Silva<sup>a</sup>**

<sup>a</sup> Advanced Technology Institute, School of Computer Science and Electronic Engineering, University of Surrey, Guildford, Surrey GU2 7XH, UK.

<sup>b</sup> Department of Electronic Engineering, School of Engineering, Hellenic Mediterranean University, Romanou 3, Chalepa, GR-73100, Chania, Crete, Greece.

### **Corresponding Authors**

\*Email:

Keywords: Organic solar cells, transition metal oxides, UV-Ozone treatment, efficiency enhancement, light soaking stability

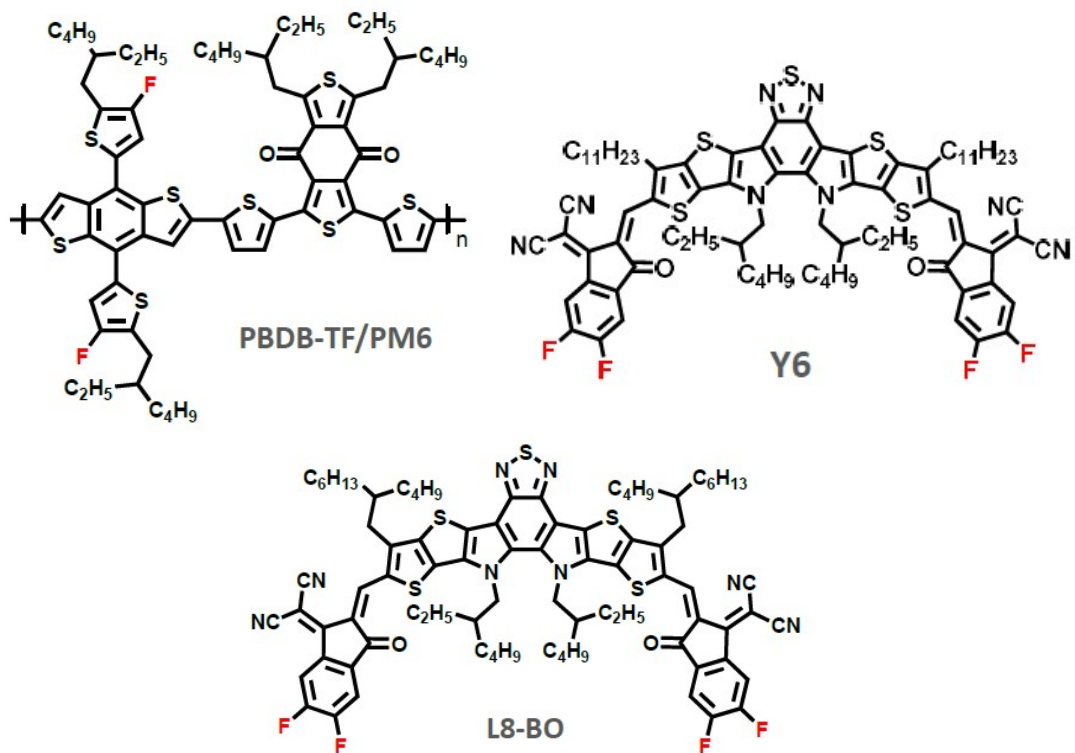

Figure S1. Molecular structures of (a) PM6, (b) Y6 and (d) L8-BO<sup>1</sup>.

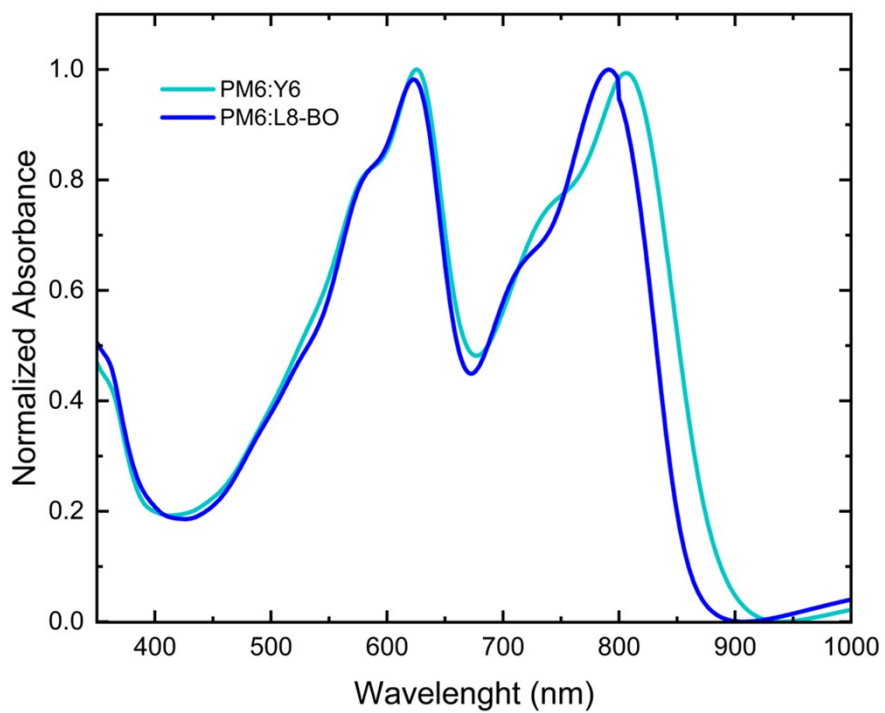

Figure S2. Normalized absorbance spectra of BHJ PM6:Y6 and PM6:L8-BO.

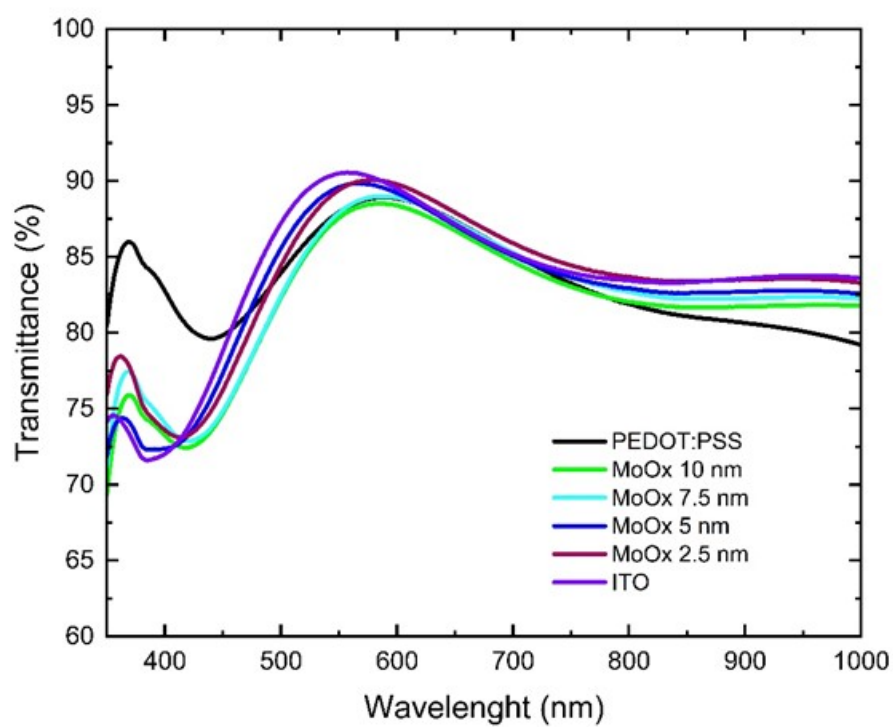

Figure S3. Transmittance spectra of various thickness of evaporated MoOx films.

Figure

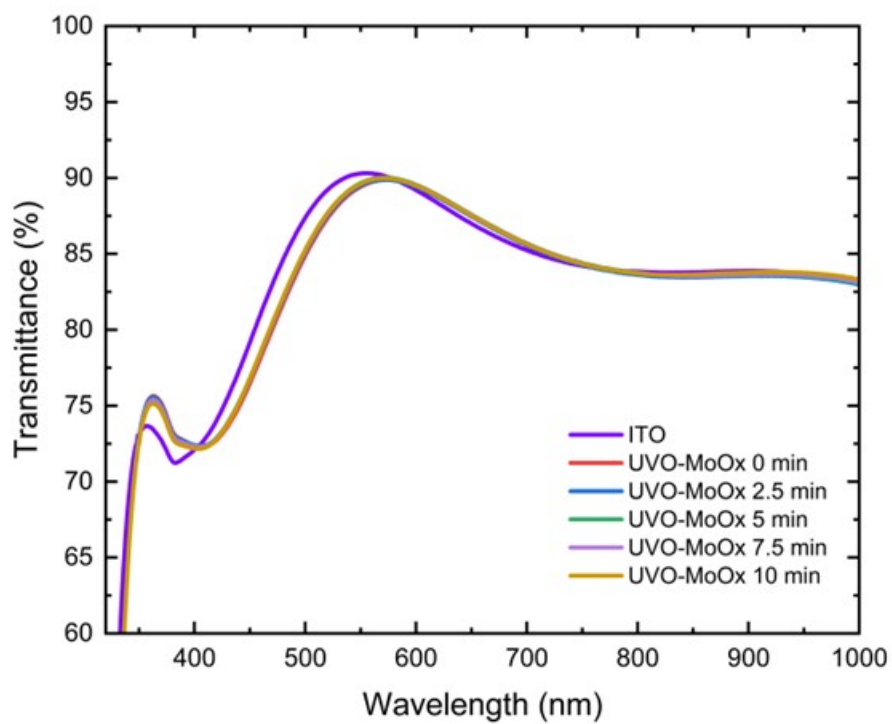

Figure S4. UV-Ozone exposure time versus transmittance of evaporated 5 nm-thick MoOx films.

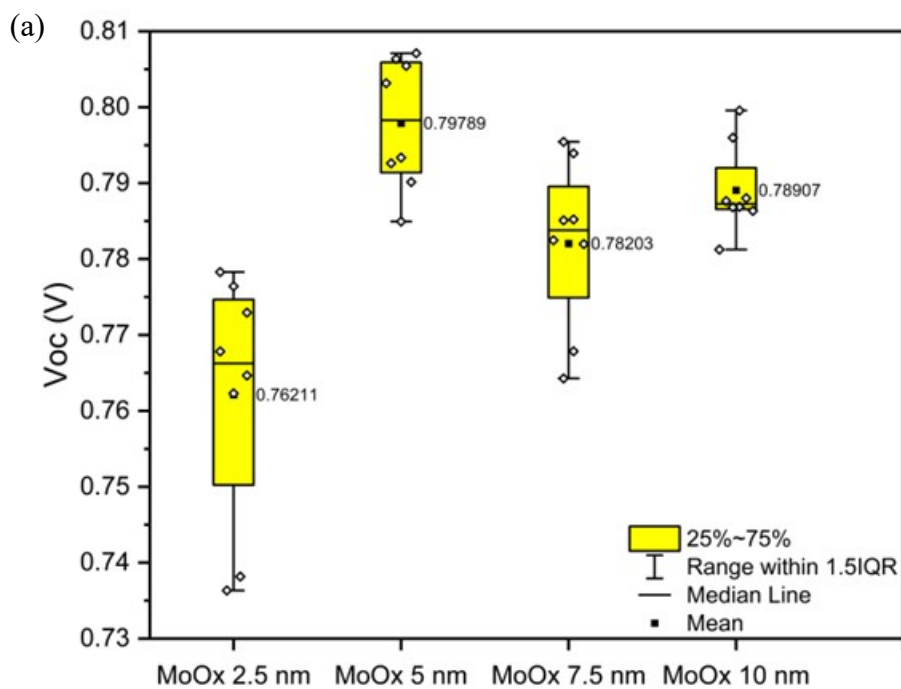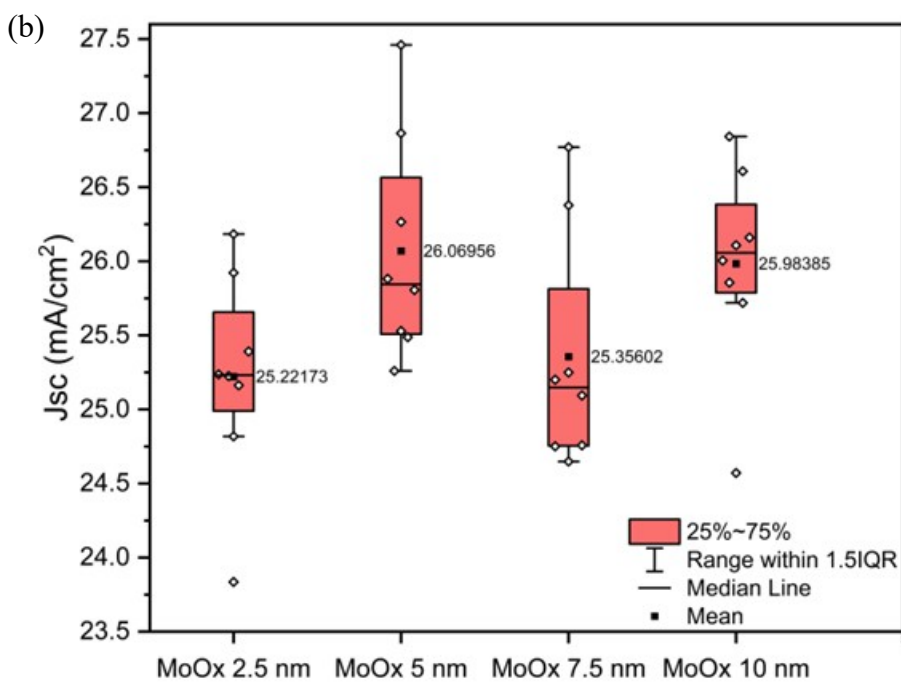

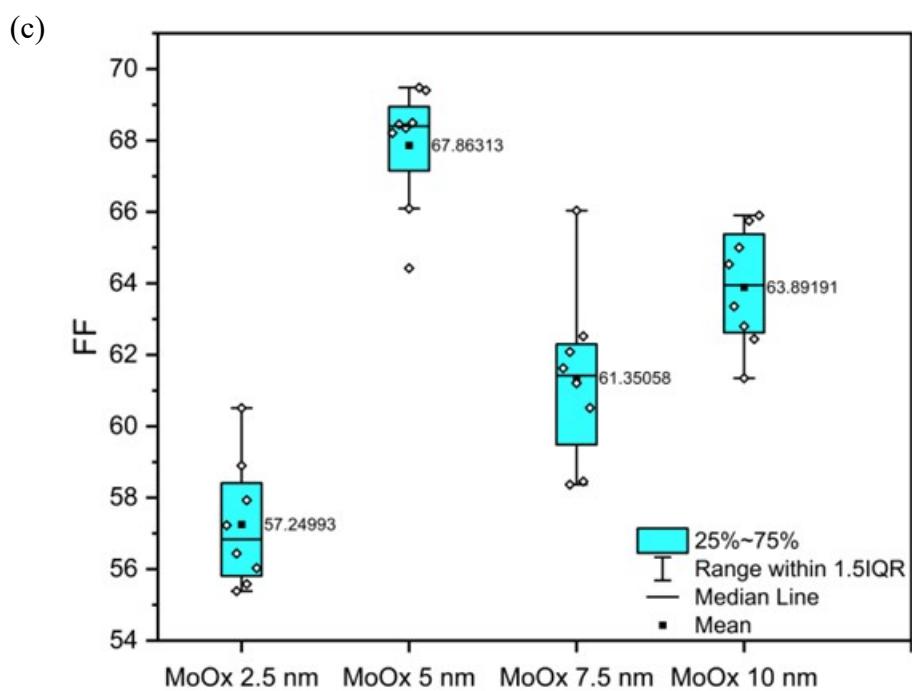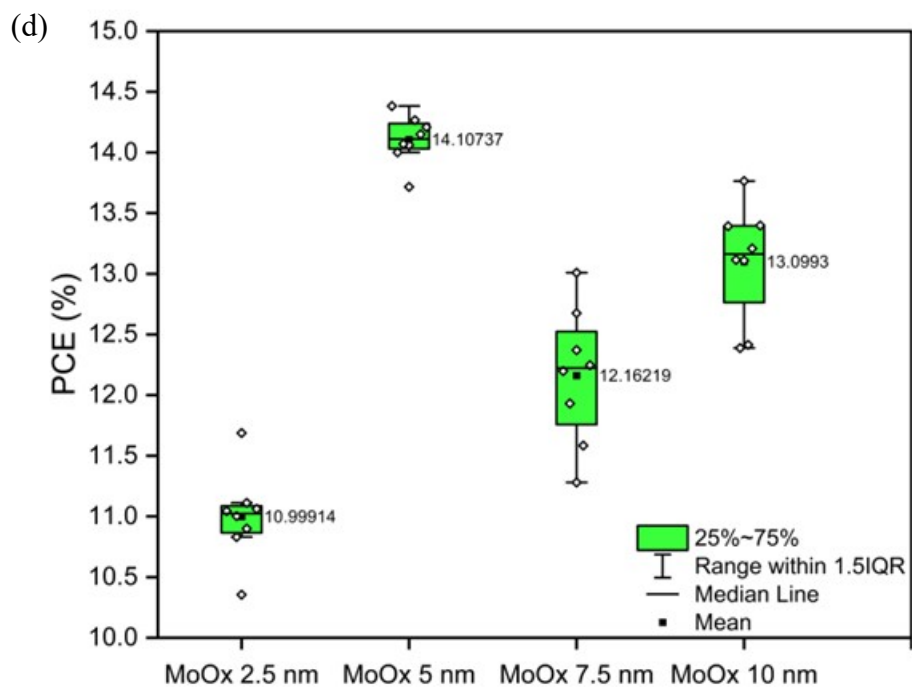

Figure S5. Evaporated MoOx layer thickness optimization statistical analysis on PM6:Y6 BHJ system (a)  $V_{OC}$ , (b)  $J_{SC}$ , (c) FF and (d) PCE from 8 individual OSCs.

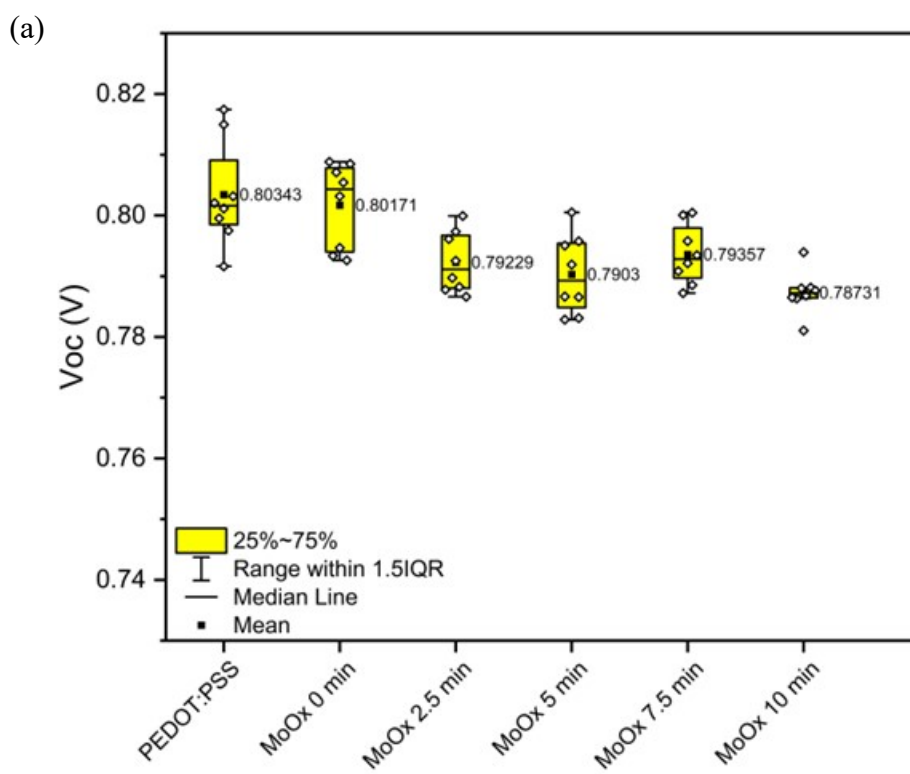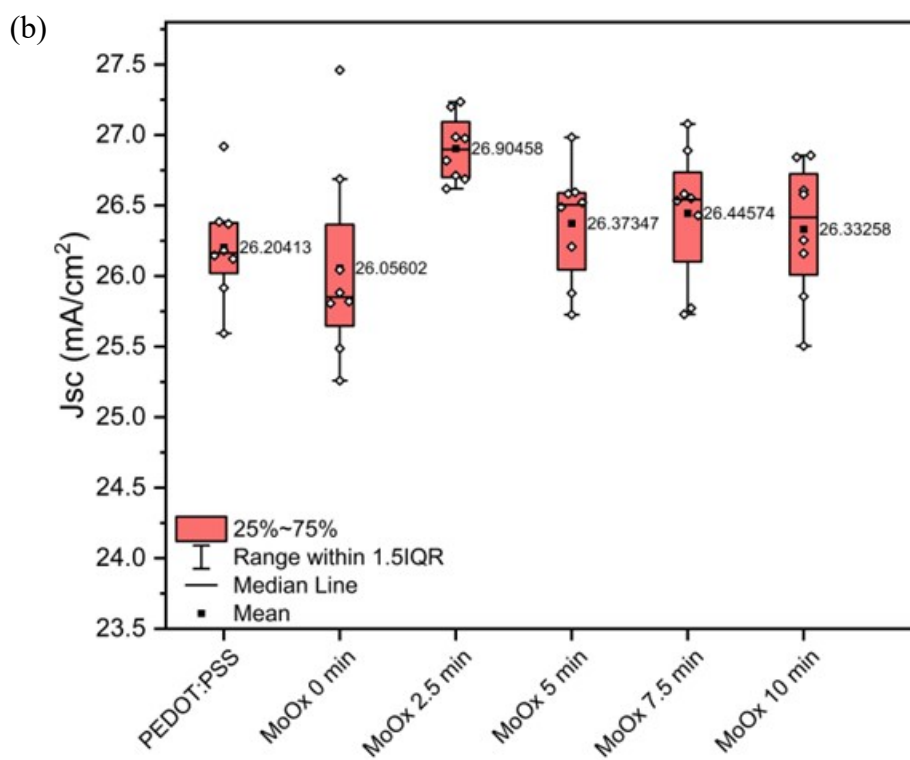

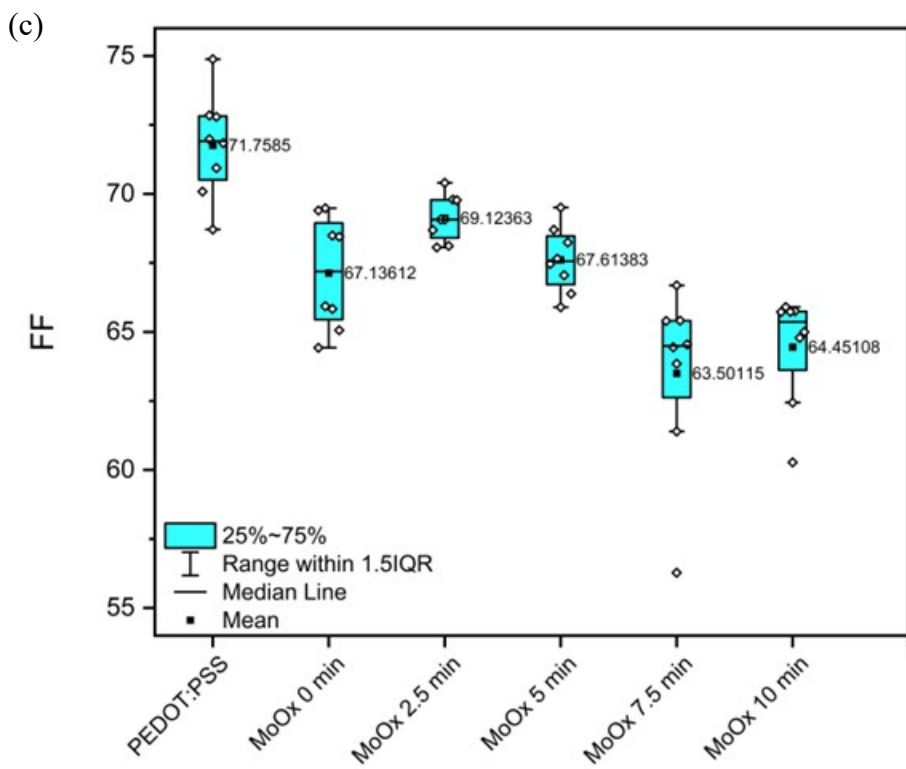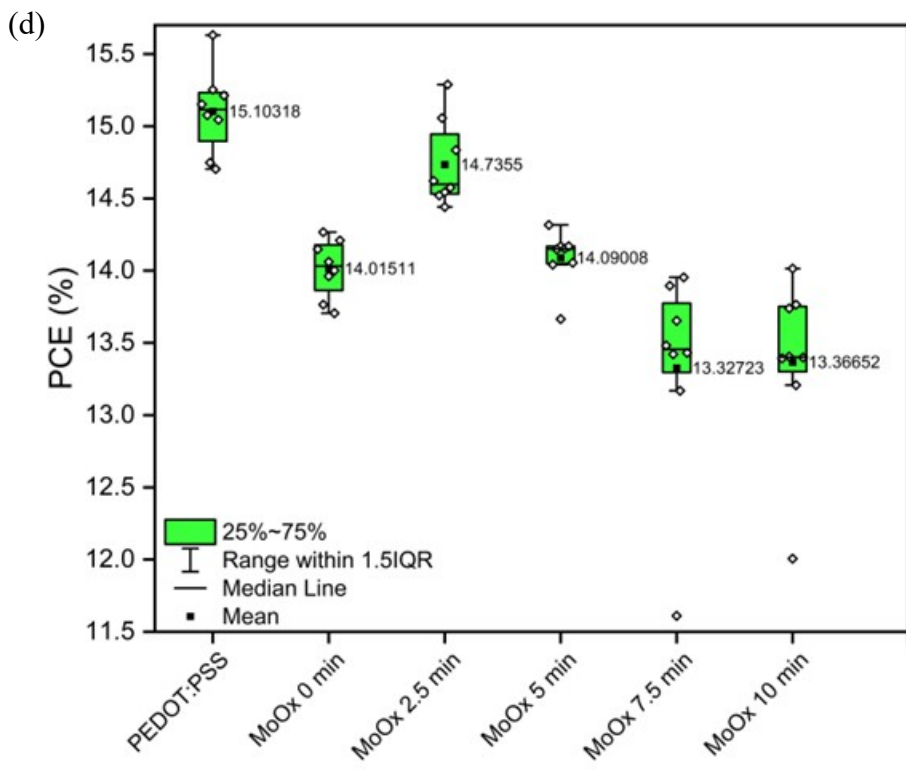

Figure S6. UV-Ozone exposure time optimization (5nm MoOx) statistical analysis on PM6:Y6 BHJ system (a)  $V_{OC}$ , (b)  $J_{SC}$ , (c) FF and (d) PCE from 8 individuals OSCs.

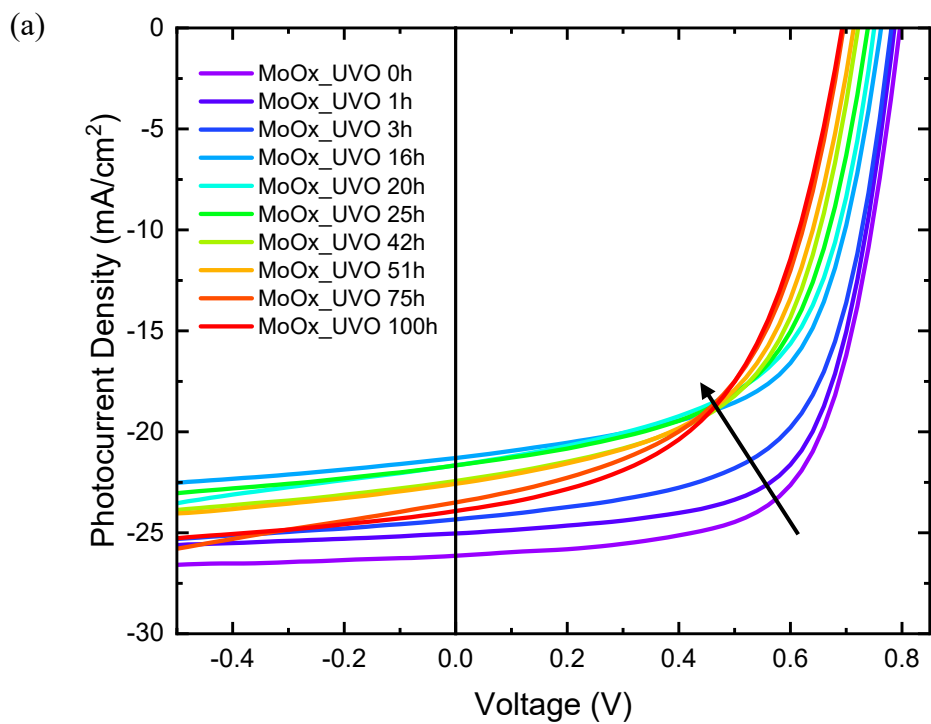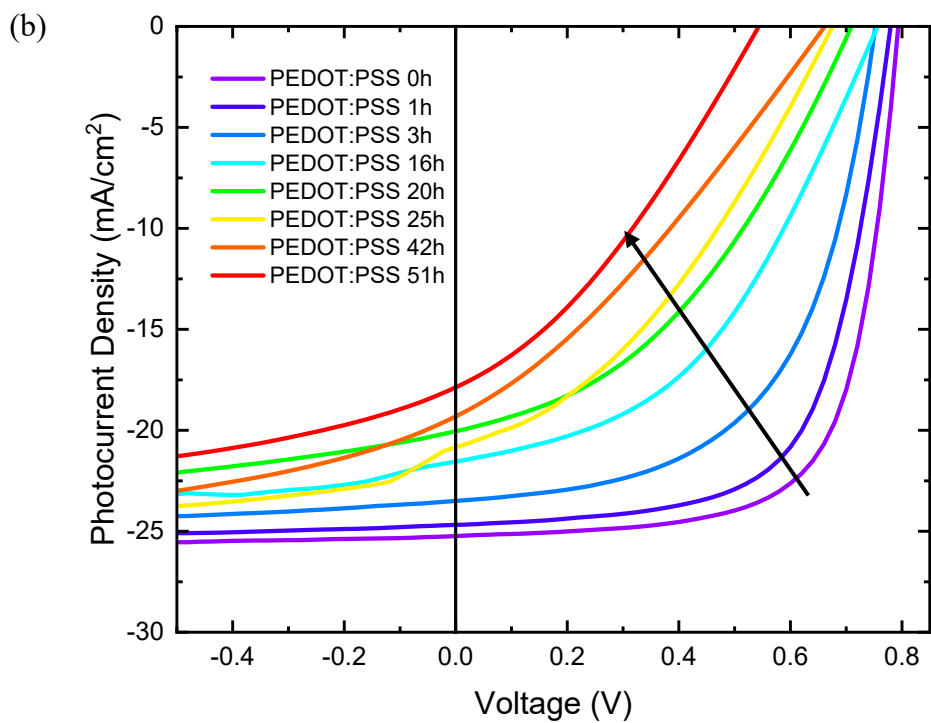



(c)

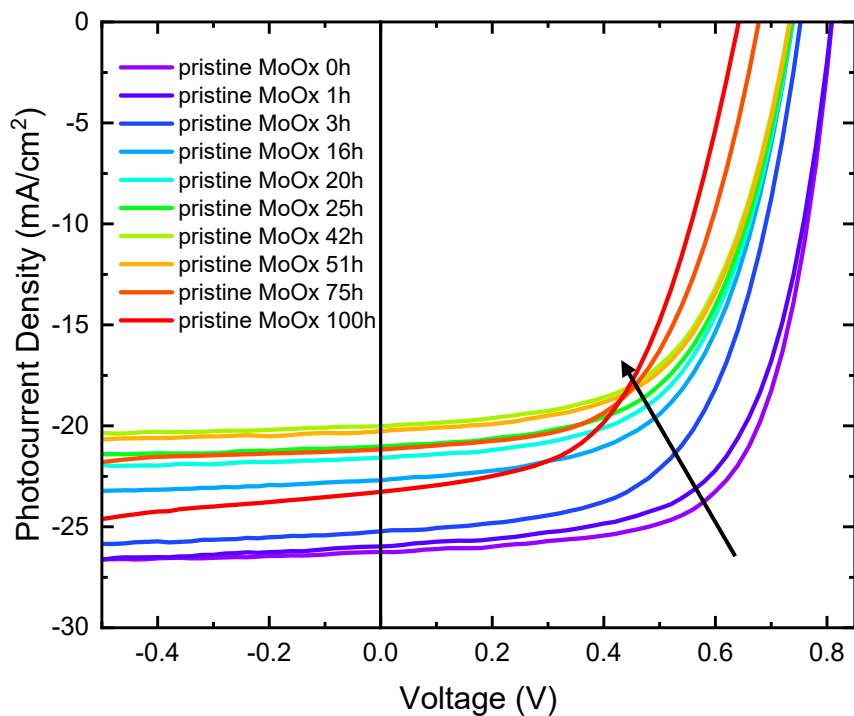

Figure S7. Time depended J-V curves (a) UV-Ozone-treated MoOx-based cells, (b) PEDOT:PSS-based cells and (c) pristine MoOx-based cells.

(a)

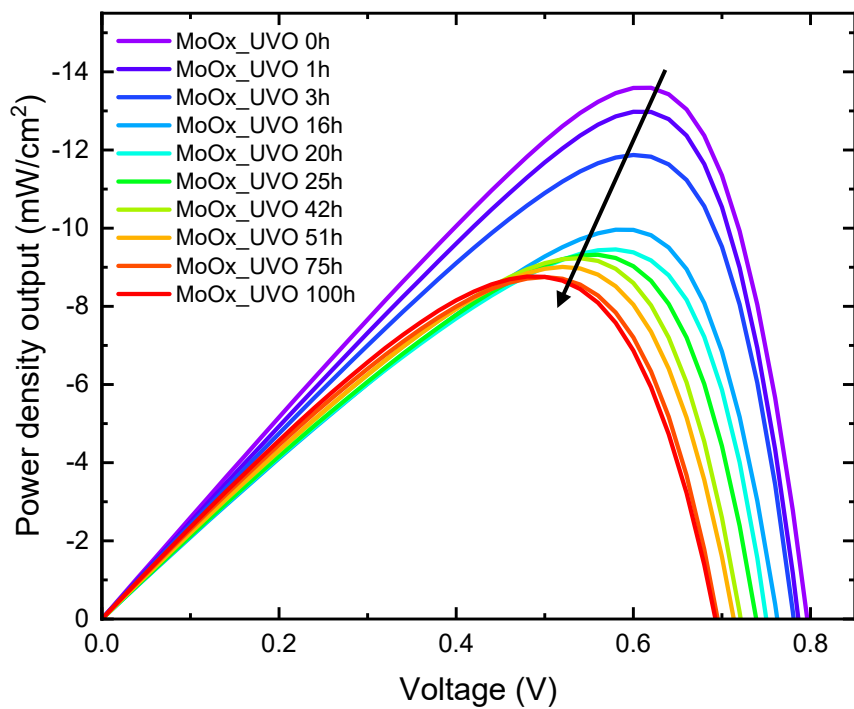

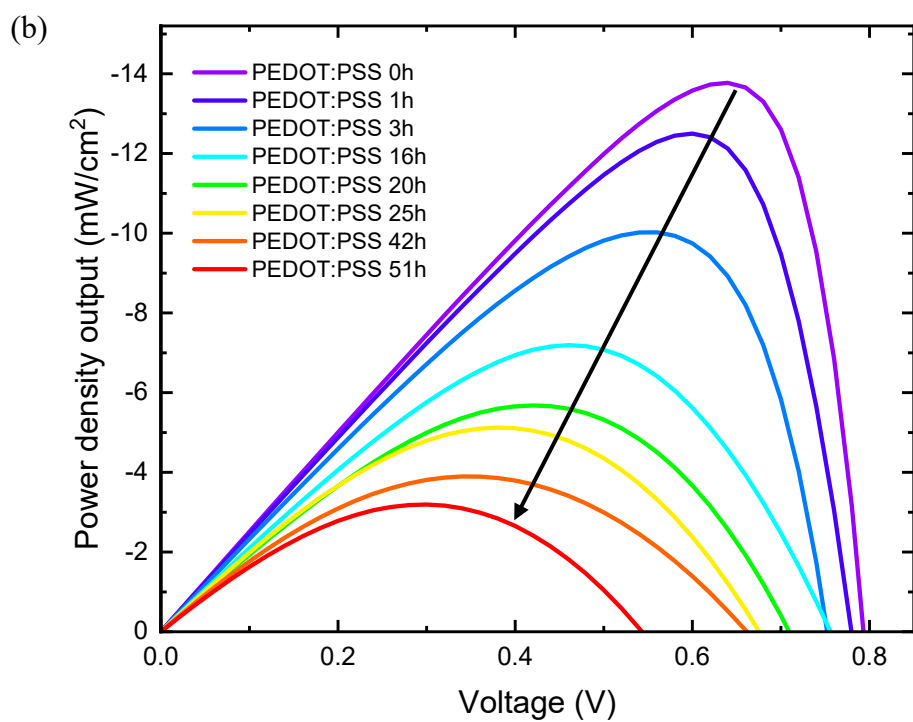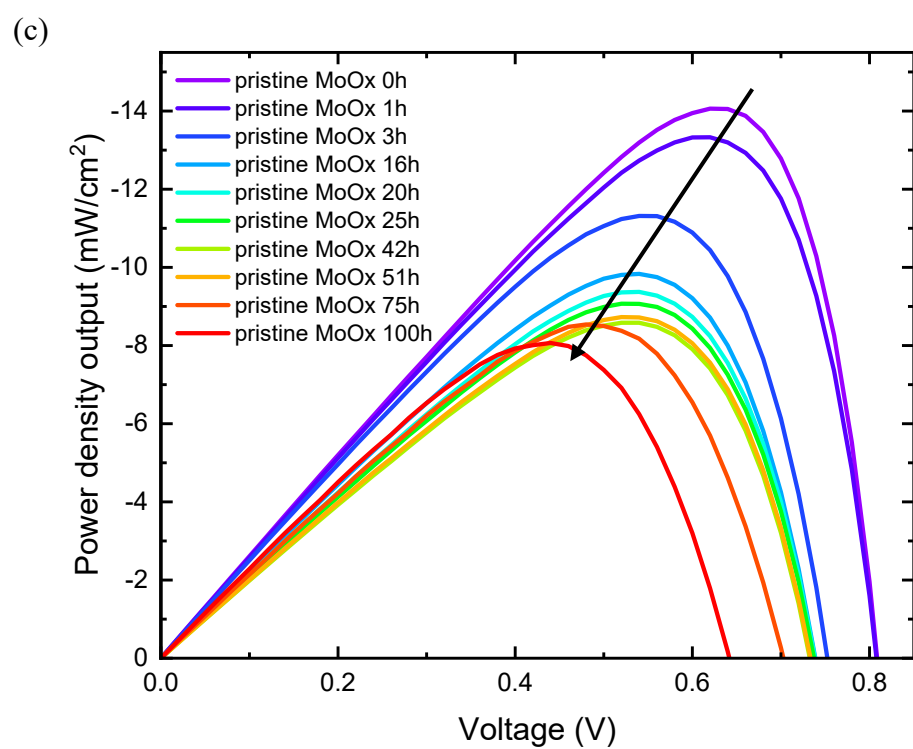

Figure S8. Time depended Power Output-Voltage curves (a) UV-Ozone-treated MoOx-based cells, (b) PEDOT:PSS-based cells and (c) pristine MoOx-based cells.

(a)

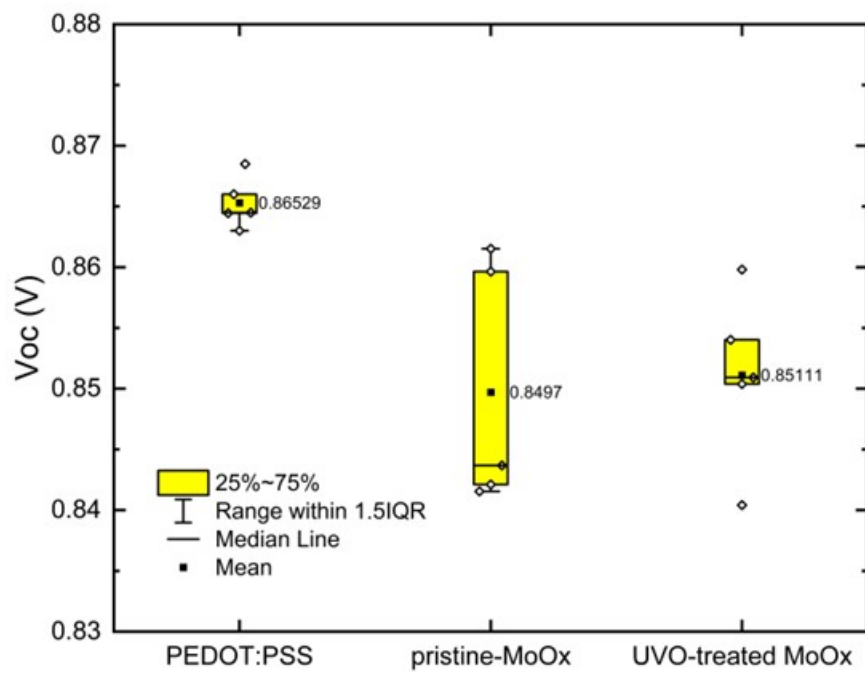

(b)

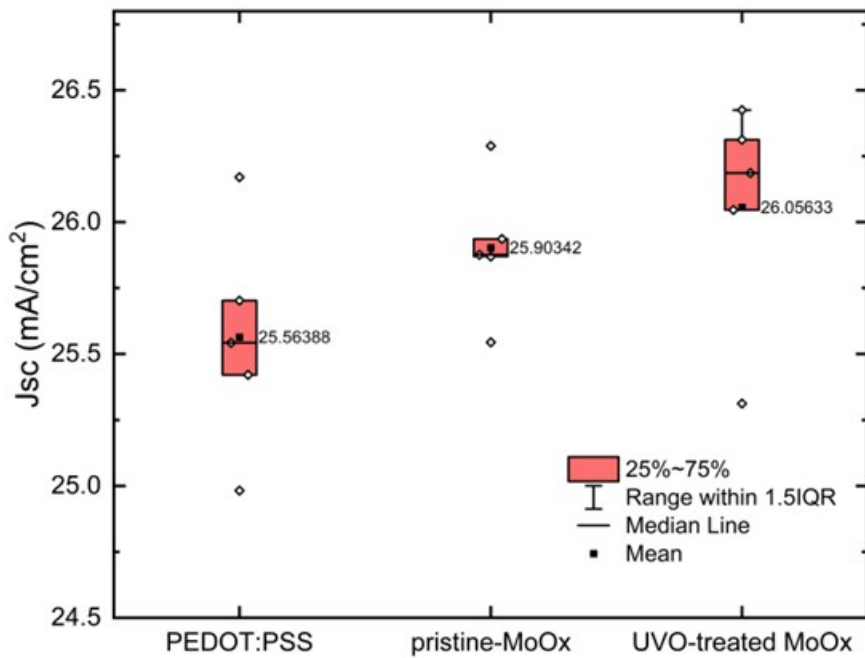

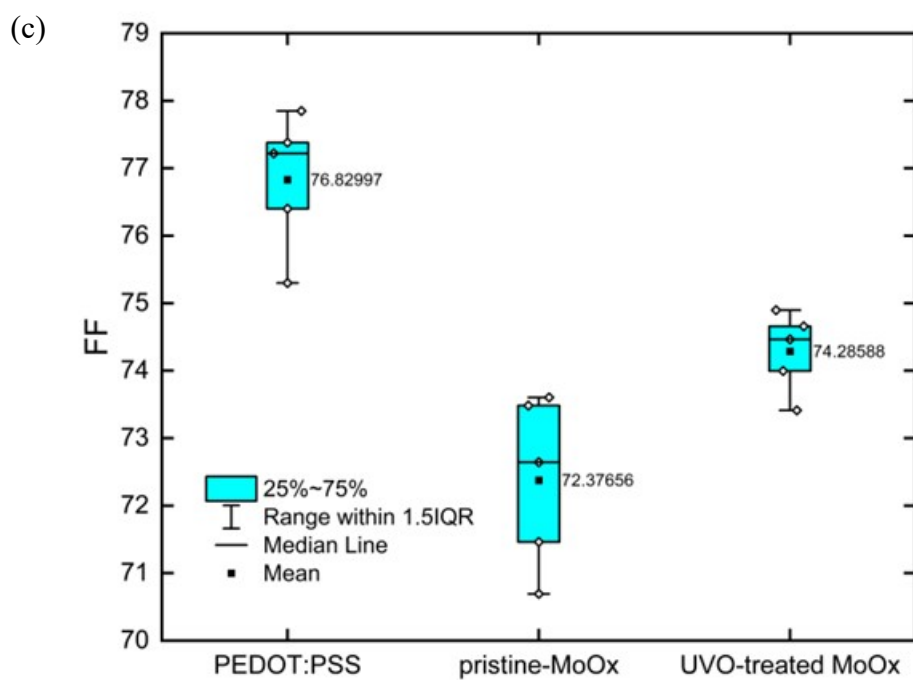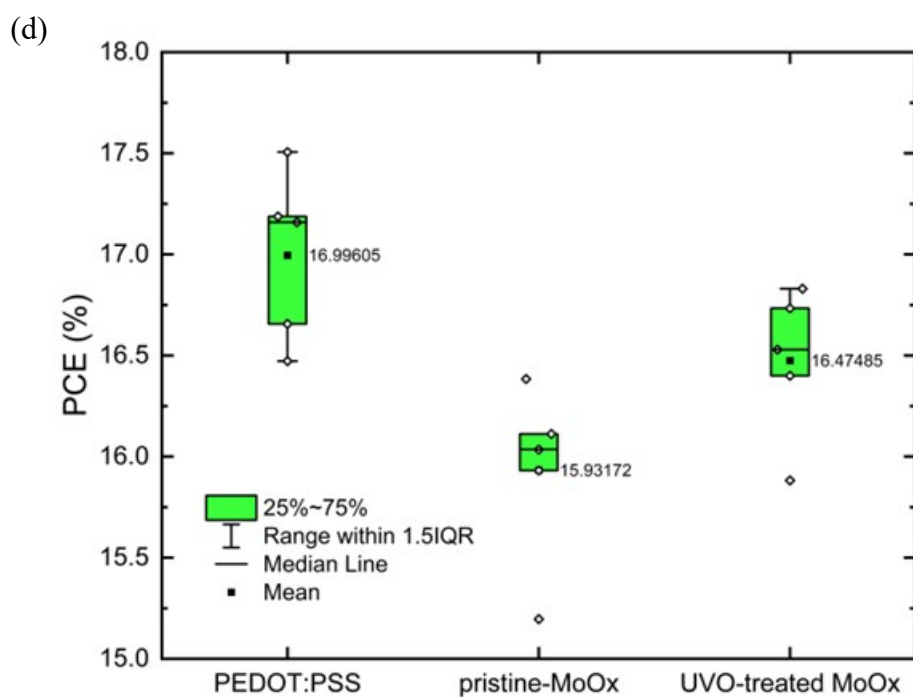

Figure S9. Statistical analysis (a)  $V_{OC}$ , (b)  $J_{SC}$ , (c) FF and (d) PCE from 5 individuals OSCs incorporating PM6:L8BO BHJ system with different HTLs.

(a)

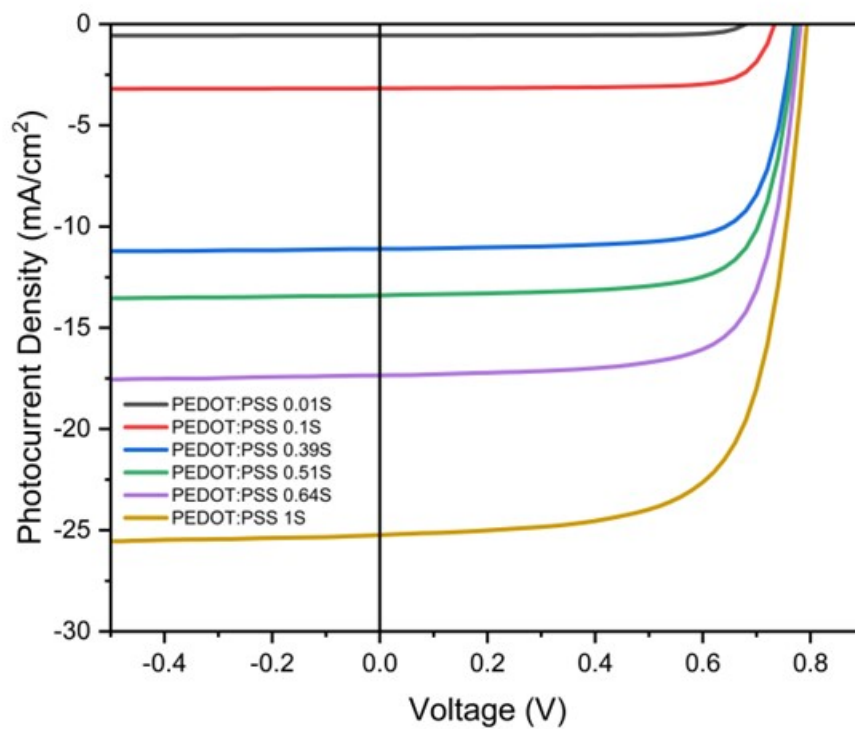

(b)

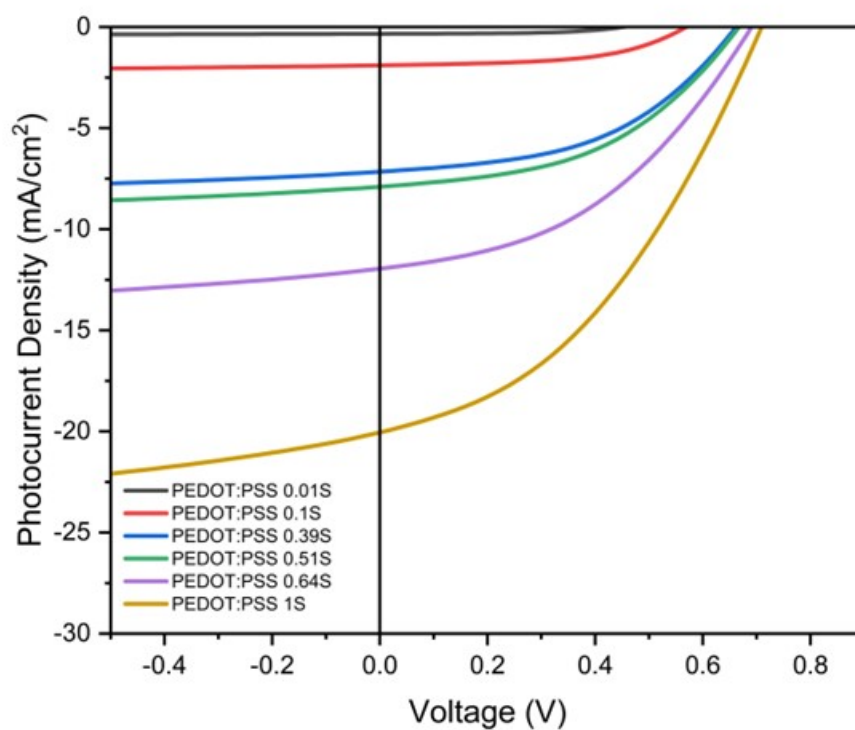

Figure S10. Light depended J-V curves (a) before light soaking test and (b) after light soaking test of PEDOT:PSS-based cells.

(a)

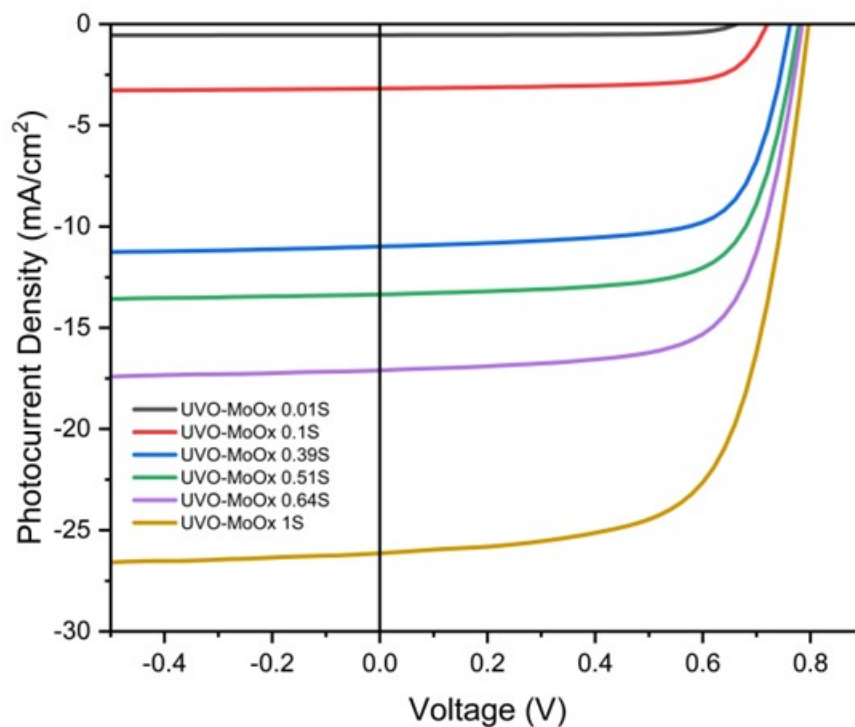

(b)

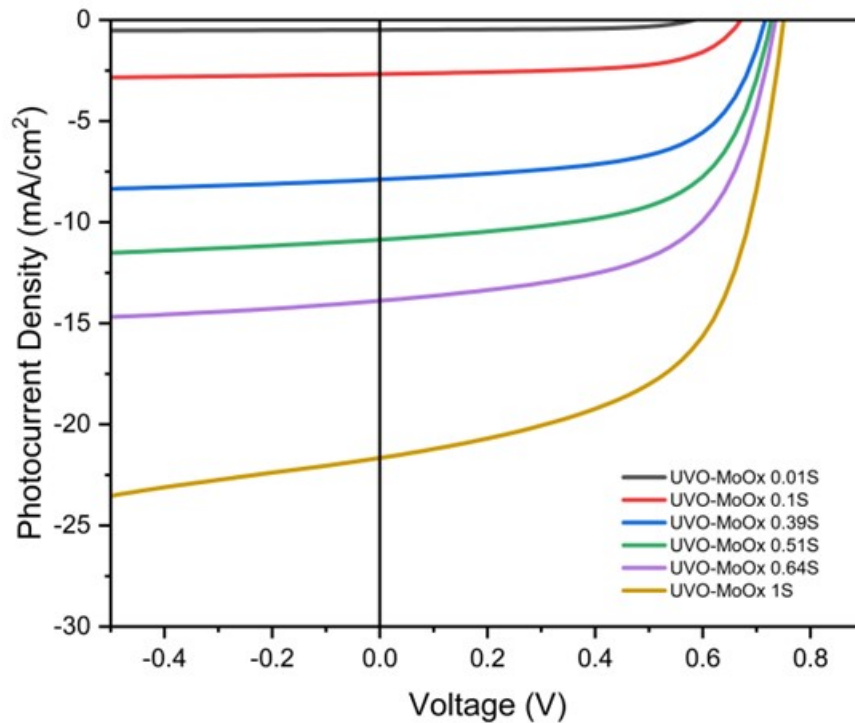

Figure S11. Light dependent J-V curves (a) before light soaking test and (b) after light soaking test of UVO-treated MoOx-based cells.

## Reference

- (1) Solarmer. Solarmer Catalog 2022 v1.1 p-Type n-Type Organic Materials. 2022.
